# Supplementary material
Source: HighWire-hosted journal article supplement (https://jnis.bmj.com/content/11/3/265)
Supplement: inline-supplementary-material-2 [file inline-supplementary-material-2.docx]

**PROTOCOL TRAINING AND OVERSIGHT**

1. For protocol initiation, Superusers will be identified from each lab who will oversee training of new researchers in the group.
2. Graduate students and post-doctoral fellows will be required to complete one monitored specimen processing procedures under direct supervision of a Superuser before being signed off to take independent call.
3. Medical students will be required to complete five monitored specimen processing procedures under direct supervision of a Superuser before being signed off to take independent call.
4. Undergraduate and high school students are not permitted to perform independent processing procedures.
5. Any protocol deviations must be reported to the PI, Dr. Fraser, within 48 hours.
